# Supplementary material
Source: MDPI journal article supplement (https://www.mdpi.com/2504-3129/1/2/11)
Supplement: s1 [file s1]

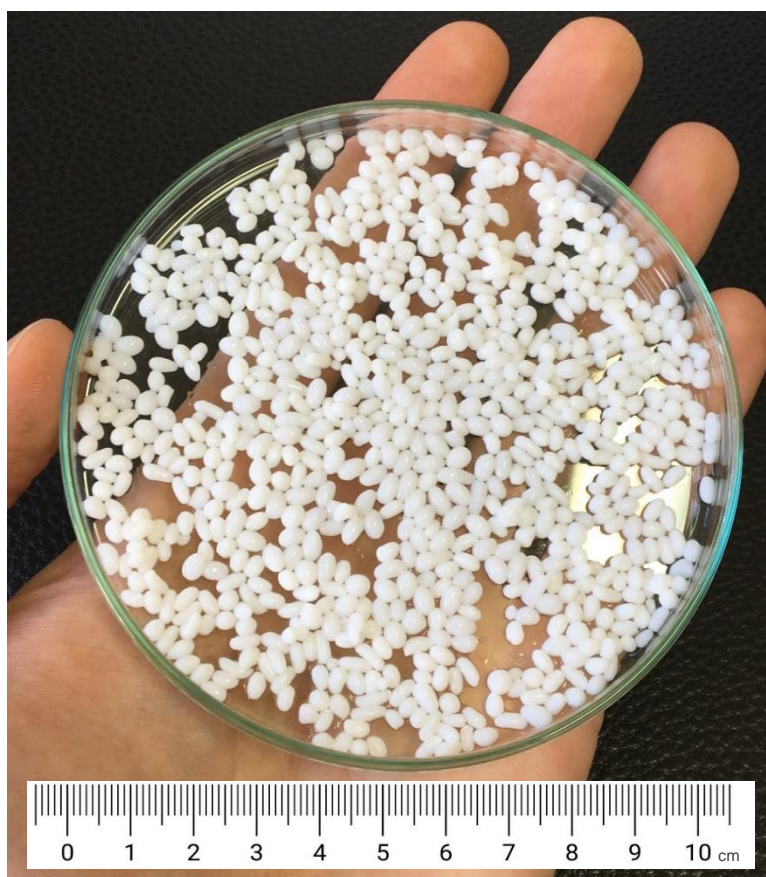

**Figure S1.** Zn-Al- $^{15}\text{NO}_3$  layered double hydroxides encapsulated in alginate beads (LDH-AN).

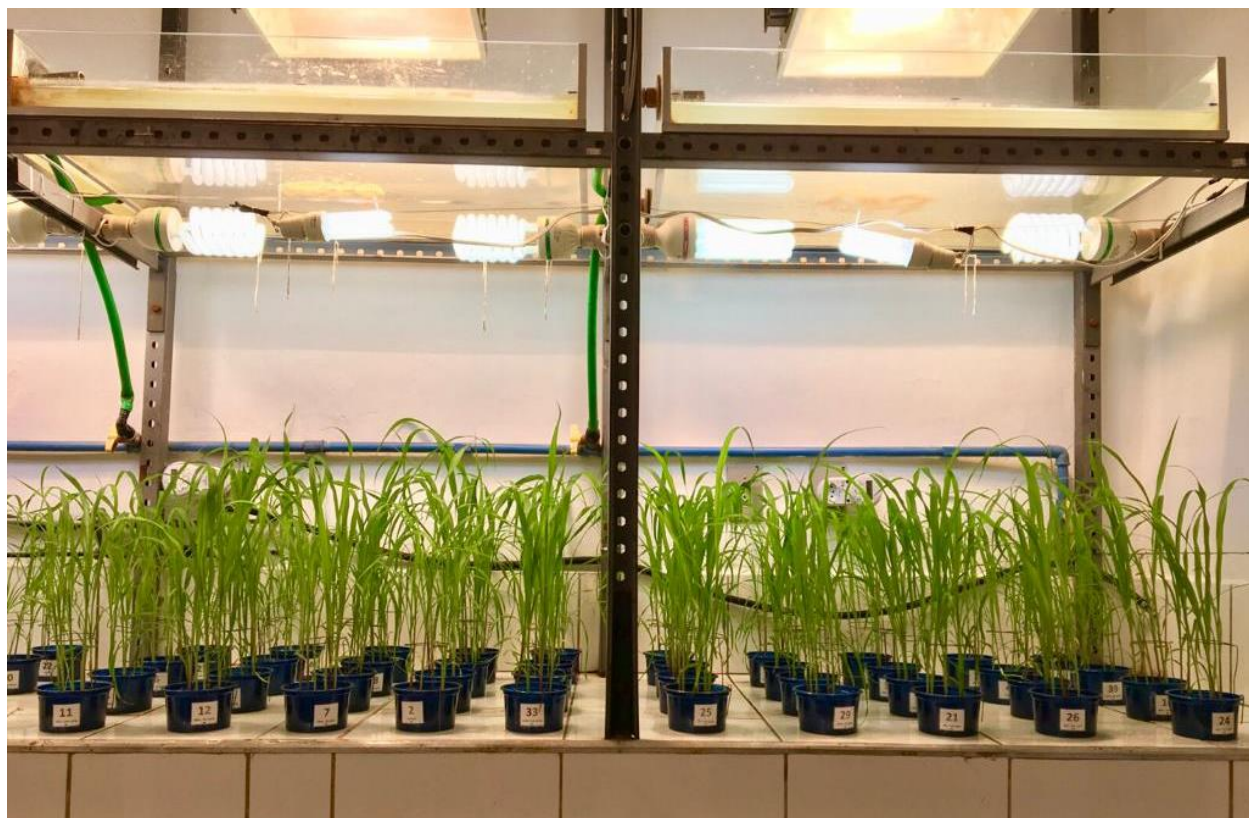

**Figure S2.** Pearl millet (*Pennisetum glaucum* L.) 25 d after transplanting in a growth chamber.

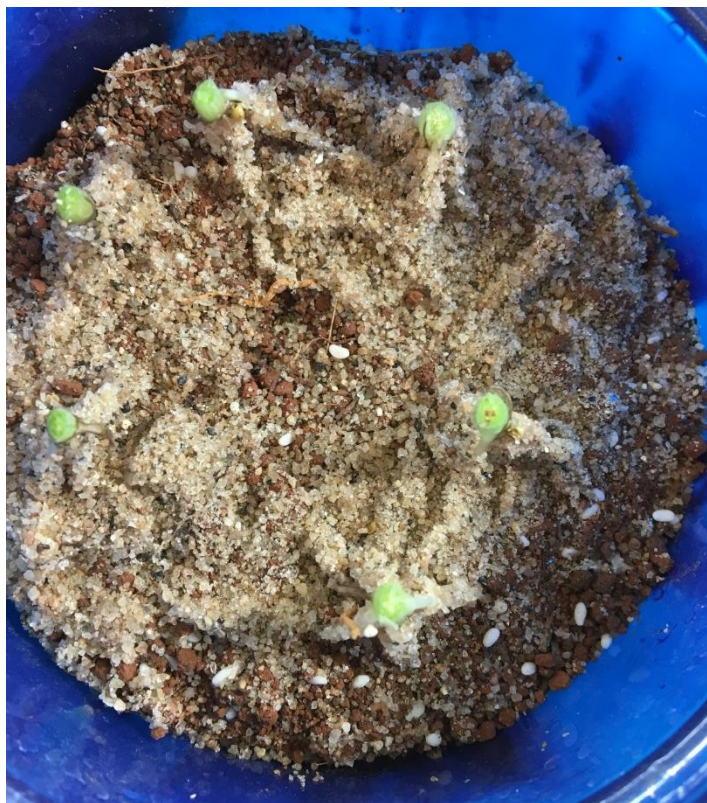

**Figure S3.** Presence of residual Zn-Al-<sup>15</sup>NO<sub>3</sub> layered double hydroxides encapsulated in alginate beads (LDH-AN) 25 d after transplanting pearl millet (*Pennisetum glaucum* L.).

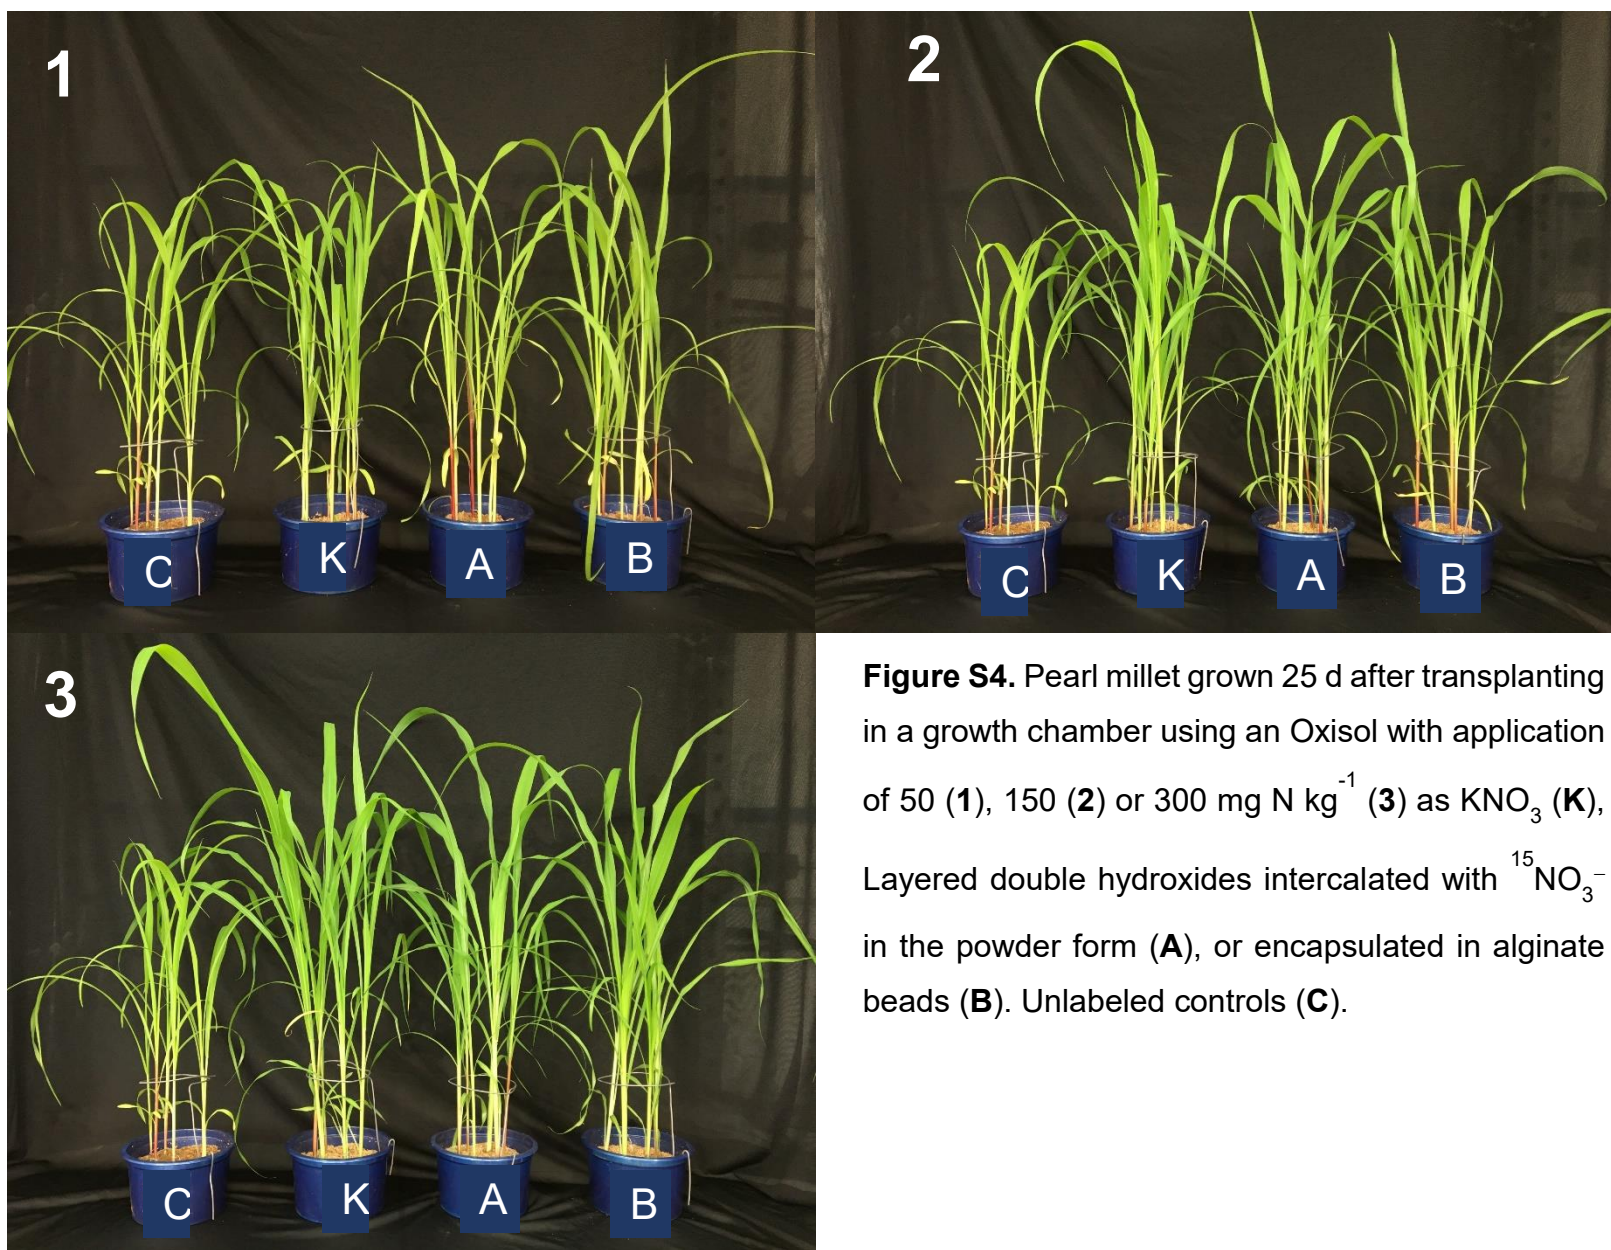

**Figure S4.** Pearl millet grown 25 d after transplanting in a growth chamber using an Oxisol with application of 50 (1), 150 (2) or 300 mg N kg<sup>-1</sup> (3) as KNO<sub>3</sub> (K), Layered double hydroxides intercalated with <sup>15</sup>NO<sub>3</sub><sup>-</sup> in the powder form (A), or encapsulated in alginate beads (B). Unlabeled controls (C).
